# Supplementary material for: Microbial community composition and diversity in rice straw digestion bioreactors with and without dairy manure
Source: PubMed Central journal article supplement (PMC6153884; doi:10.1007/s00253-018-9243-7), 2018-07-27

# Applied Microbiology and Biotechnology

## Supplementary Information

### Microbial Community Composition and Diversity in Rice Straw Co-digestion Bioreactors with Dairy Manure

A. M. Zealand<sup>a</sup>, R. Mei<sup>b</sup>, P. Papachristodoulou<sup>a</sup>, A. P. Roskilly<sup>c</sup>, W. T. Liu<sup>b</sup>,  
and D. W. Graham<sup>a\*</sup>

<sup>a</sup> *School of Engineering, Newcastle University, Newcastle upon Tyne, NE1 7RU, UK*

<sup>b</sup> *Department of Civil and Environmental Engineering, University of Illinois at Urbana-Champaign, 205 North Mathews Ave, Urbana, IL 61801, USA*

<sup>c</sup> *Sir Joseph Swan Centre for Energy Research, Newcastle University, Newcastle upon Tyne, NE1 7RU, UK*

\*Corresponding author: Prof David W. Graham  
School of Engineering  
Cassie Building  
Newcastle University  
Newcastle upon Tyne  
United Kingdom NE1 7RU  
Phone: +44-191-208-7930  
E-mail: david.graham@newcastle.ac.uk

### **Additional Methods in Next Generation Sequencing:**

The PCRs included 1 to 10 ng of DNA extract (total volume 1 µl), 15 pmol of each forward primer and reverse primer (in 20 µL volume of 1 x MyTaq buffer containing 1.5 units MyTaq DNA polymerase (Bioline) and 2 µl of BioStabII PCR Enhancer (Sigma). For each sample, the forward and reverse primers had the same 10-nt barcode sequence. PCRs were carried out for 30 cycles using the following parameters: 2 min 96°C pre-denaturation; 96°C for 15 s, 50°C for 30 s, 70°C for 90 s. DNA concentration of amplicons of interest was determined by gel electrophoresis. About 20 ng of amplicon DNA from each sample were pooled for up to 48 samples carrying different barcodes. If needed, PCRs with low yields were further amplified for 5 cycles.

The amplicon pools were purified with one volume AMPure XP beads (Agencourt) to remove primer dimer and other small mispriming products, followed by an additional purification on MinElute columns (Qiagen). About 100 ng of each purified amplicon pool DNA was used to construct Illumina libraries using the Ovation Rapid DR Multiplex System 1-96 (NuGEN). Illumina libraries were pooled and size selected by preparative gel electrophoresis. Sequencing was done on an Illumina MiSeq using V3 Chemistry (Illumina).

A total of 419,747 quality filtered samples were obtained from 15 samples with the number of 16S rDNA sequences ranging from 10,864 to 48,127 (mean, 27,983). After removing the chimera sequences the operational taxonomic units (OTUs) were picked at more than 97 % similarity representing 9,720 OTUs. The alpha and beta diversity of the microbial community were then assessed.

## List of Figures:

- Figure S1:** Time-course data of digester performance including acclimation period (experiment 'Time 0' shown by dashed line) for pH, %Volatile Solids Removal (VSR), g VS/L, specific methane yields and VFA levels for: **a)** RS100, **b)** RS90, **c)** RS70, **d)** RS30.
- Figure S2:** Shared predominant OTU table to the genus level (only  $\geq 0.5$  % abundance) in bioreactor and raw dairy manure based on sample appearances. "H1", "H2", and "H3" refer to each HRT cycle (25 days) the reactors were operated.
- Figure S3:** Phylogenetic tree of predominant OTUs (only  $\geq 0.5$  % abundance) shared across all samples. Branch closeness and small white, grey, and black circles on branch junctions indicate percentage of similarity (50 - 69 %, 70 - 89 %, and 90+ %).
- Figure S4:** Extended error bar plot of significant differences between predominant OTUs in the RS100 reactor versus raw dairy manure (DM).
- Figure S5:** Extended error bar plot of significant differences between predominant OTUs in the RS90 reactor versus raw dairy manure (DM).
- Figure S6:** Extended error bar plot of significant differences between predominant OTUs in the RS70 reactor versus raw dairy manure (DM).
- Figure S7:** Extended error bar plot of significant differences between predominant OTUs in the RS30 reactor versus raw dairy manure (DM).

Figure S1

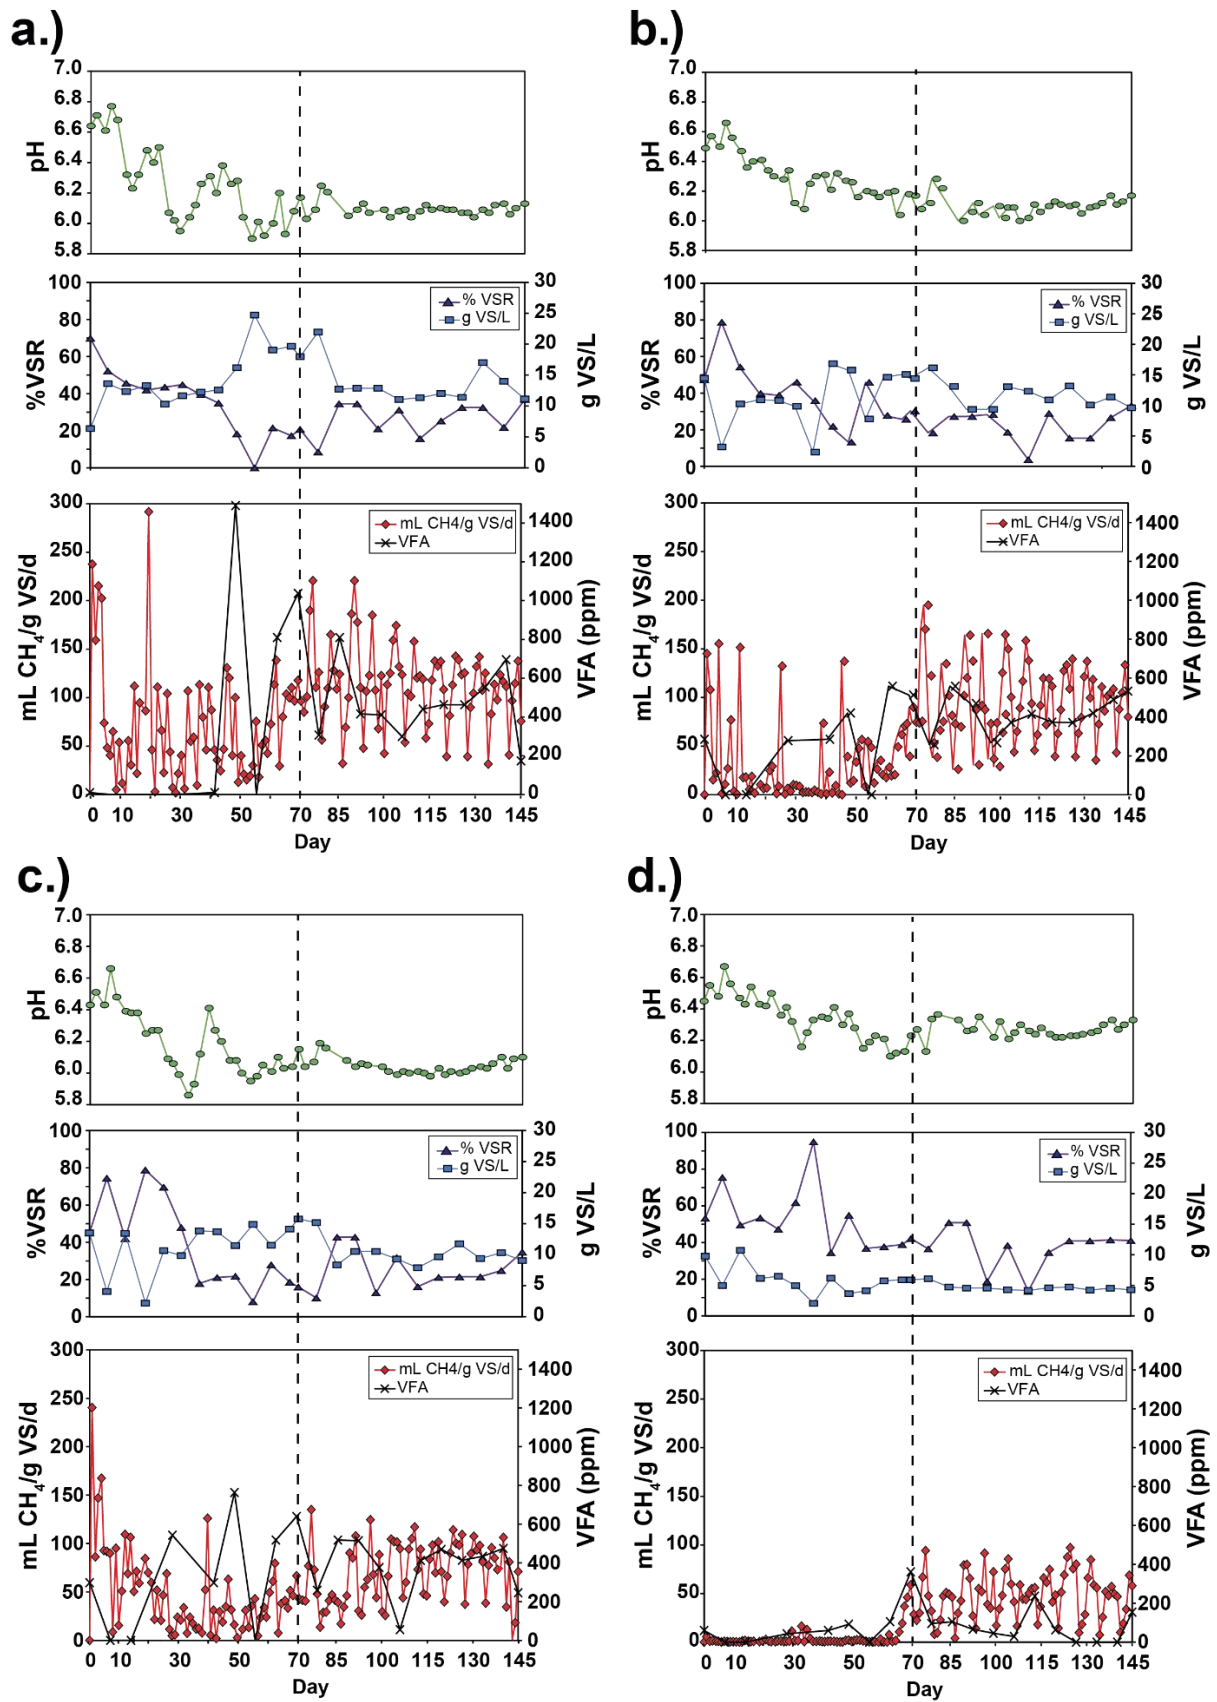

Figure S2

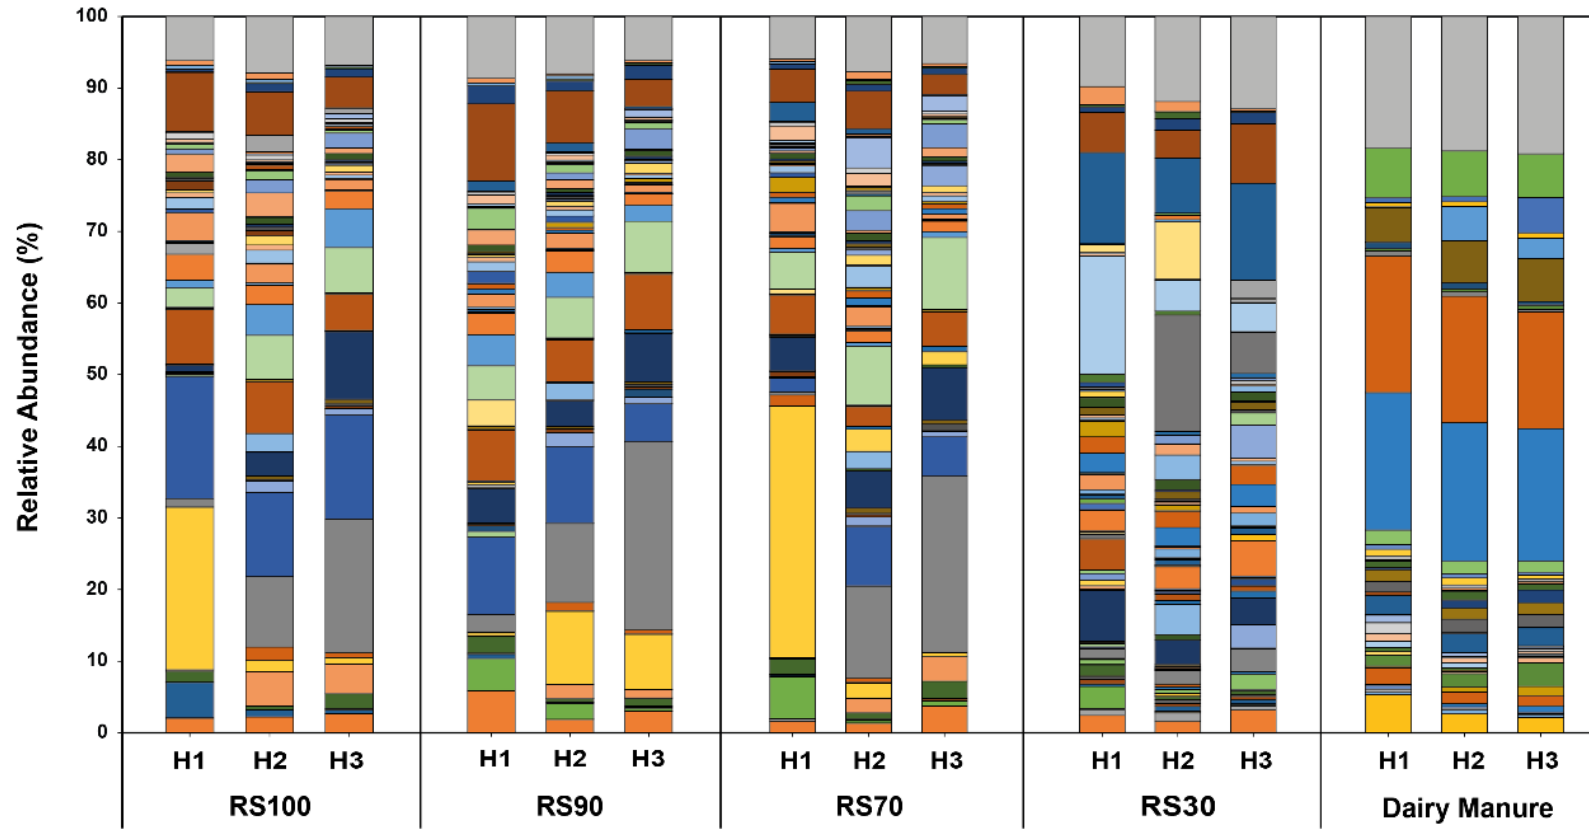

|         |         |         |         |         |         |         |         |         |         |                |
|---------|---------|---------|---------|---------|---------|---------|---------|---------|---------|----------------|
| OTU 036 | OTU 005 | OTU 013 | OTU 052 | OTU 011 | OTU 044 | OTU 002 | OTU 084 | OTU 135 | OTU 221 | OTU 022        |
| OTU 008 | OTU 047 | OTU 179 | OTU 009 | OTU 175 | OTU 042 | OTU 084 | OTU 053 | OTU 010 | OTU 130 | OTU 022        |
| OTU 012 | OTU 069 | OTU 101 | OTU 186 | OTU 245 | OTU 180 | OTU 061 | OTU 059 | OTU 150 | OTU 117 | OTU 164        |
| OTU 105 | OTU 021 | OTU 160 | OTU 068 | OTU 219 | OTU 311 | OTU 071 | OTU 063 | OTU 123 | OTU 019 | OTU 019        |
| OTU 187 | OTU 158 | OTU 204 | OTU 178 | OTU 137 | OTU 131 | OTU 120 | OTU 024 | OTU 140 | OTU 023 | OTU 033        |
| OTU 014 | OTU 138 | OTU 159 | OTU 037 | OTU 017 | OTU 027 | OTU 181 | OTU 088 | OTU 087 | OTU 109 | OTU 113        |
| OTU 074 | OTU 030 | OTU 127 | OTU 122 | OTU 147 | OTU 076 | OTU 015 | OTU 016 | OTU 145 | OTU 070 | OTU 031        |
| OTU 166 | OTU 007 | OTU 054 | OTU 146 | OTU 083 | OTU 080 | OTU 183 | OTU 124 | OTU 162 | OTU 121 | OTU 039        |
| OTU 106 | OTU 057 | OTU 153 | OTU 056 | OTU 315 | OTU 174 | OTU 051 | OTU 065 | OTU 155 | OTU 218 | OTU 055        |
| OTU 165 | OTU 194 | OTU 139 | OTU 028 | OTU 077 | OTU 089 | OTU 092 | OTU 079 | OTU 148 | OTU 067 | OTU 200        |
| OTU 097 | OTU 136 | OTU 072 | OTU 038 | OTU 026 | OTU 018 | OTU 040 | OTU 182 | OTU 041 | OTU 132 | OTU 111        |
|         |         |         |         | OTU 062 |         |         |         |         |         |                |
|         |         |         |         |         |         |         |         |         |         | Others (<0.5%) |

Figure S3

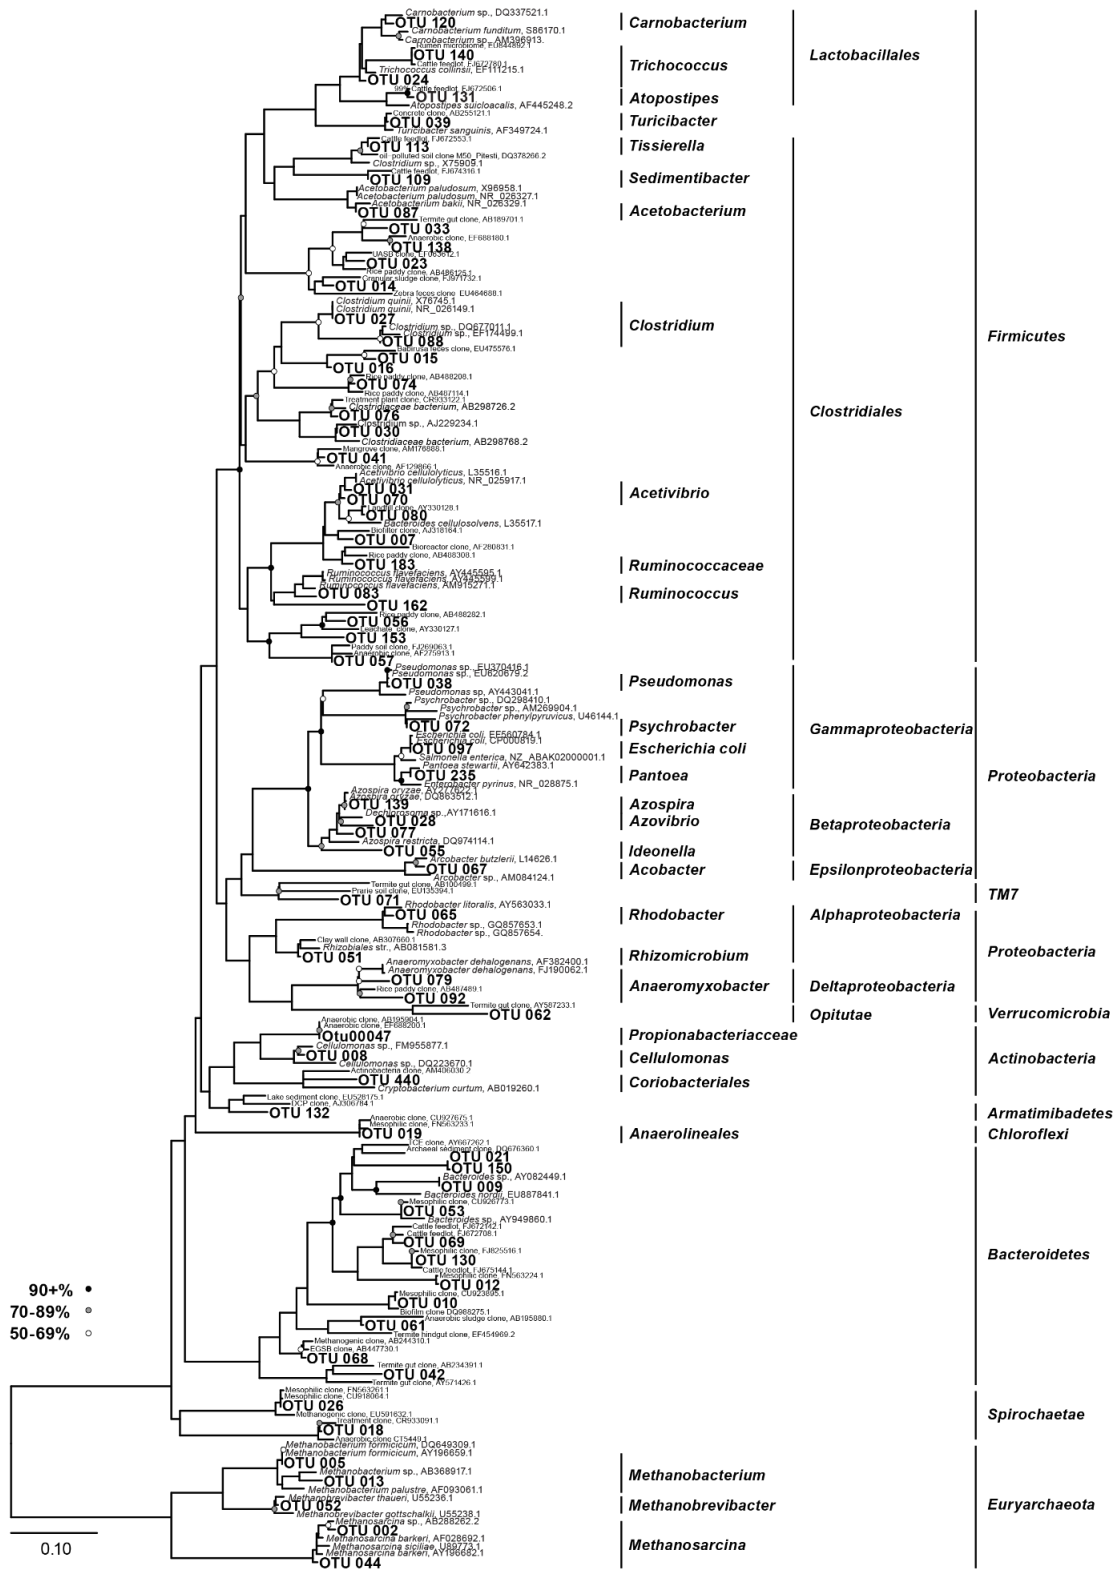

**Figure S4**

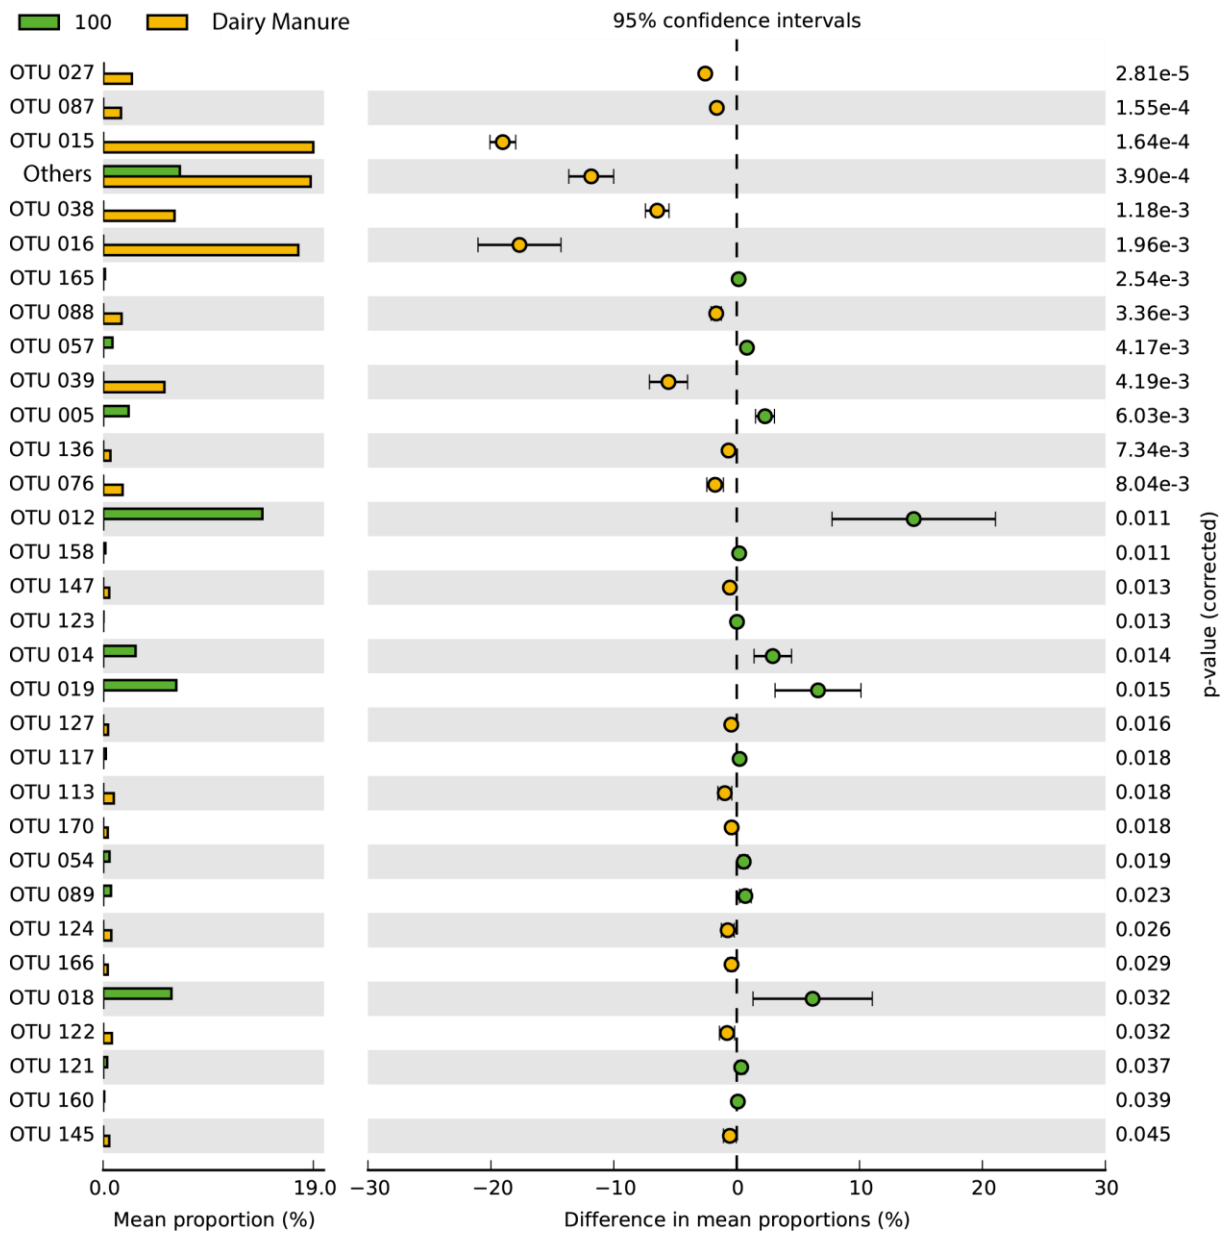

**Figure S5**

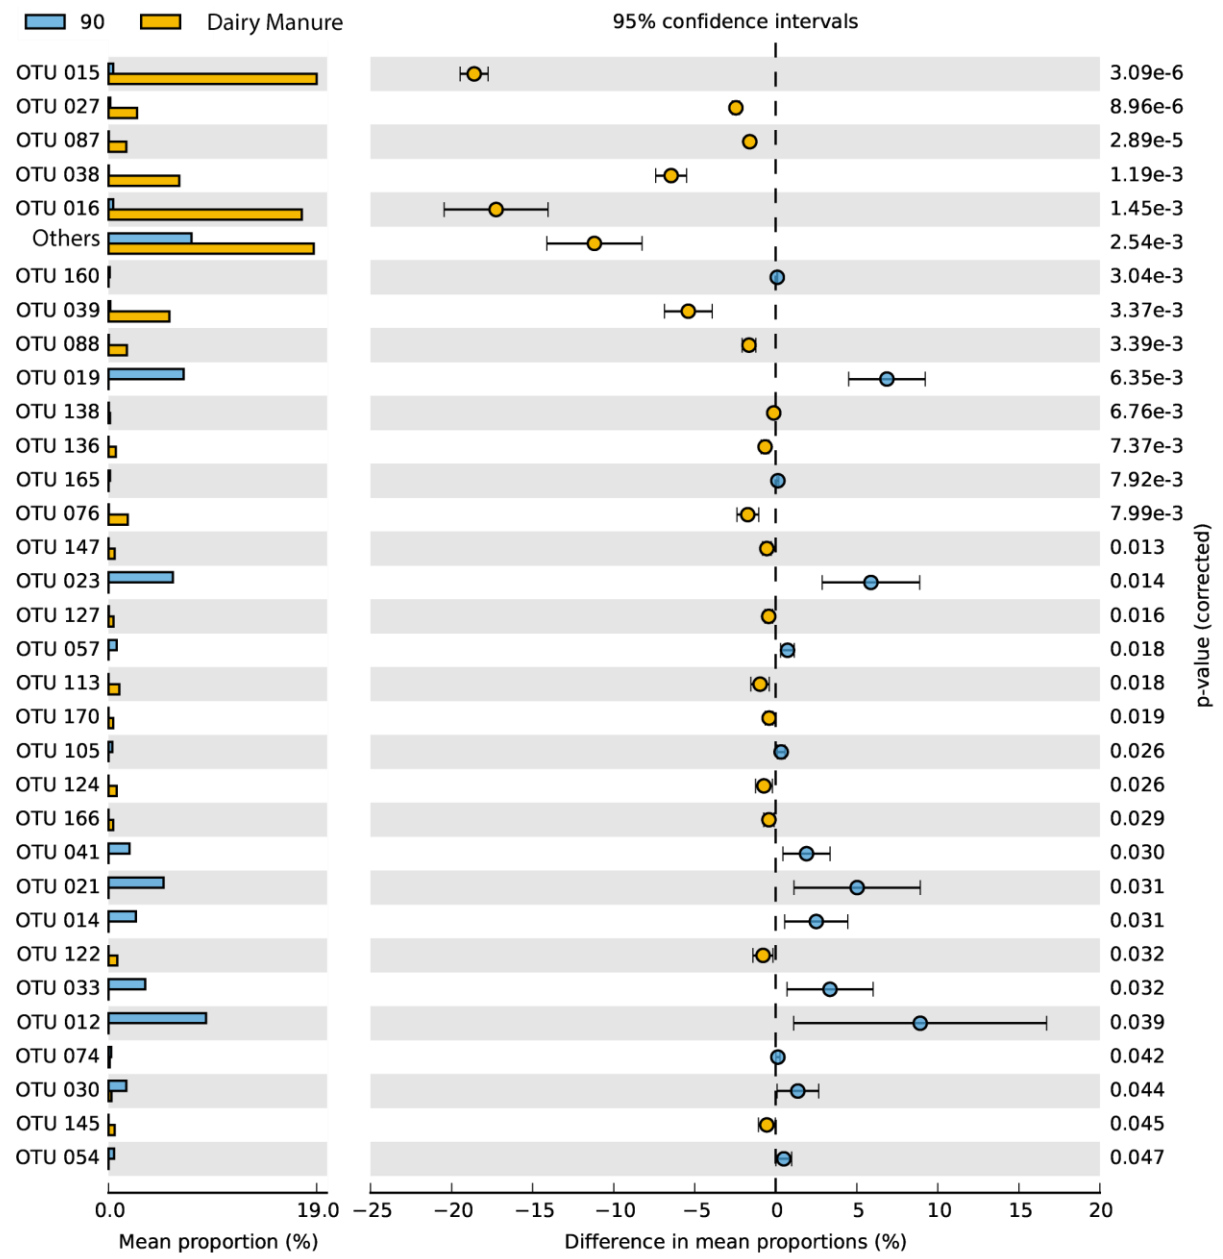



**Figure S6**

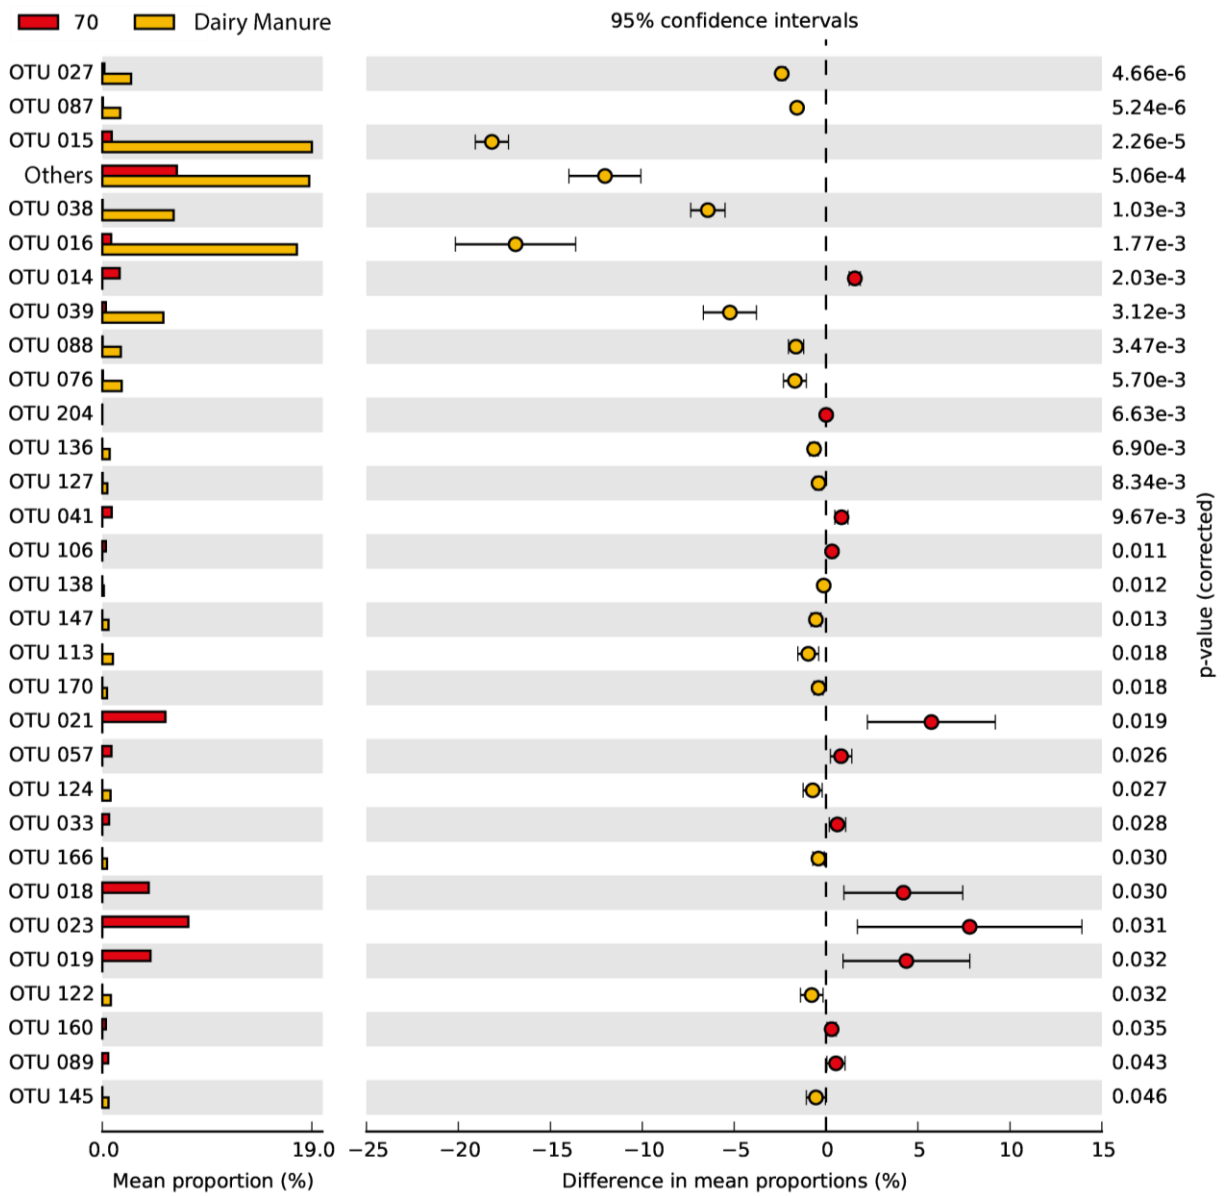

**Figure S7**

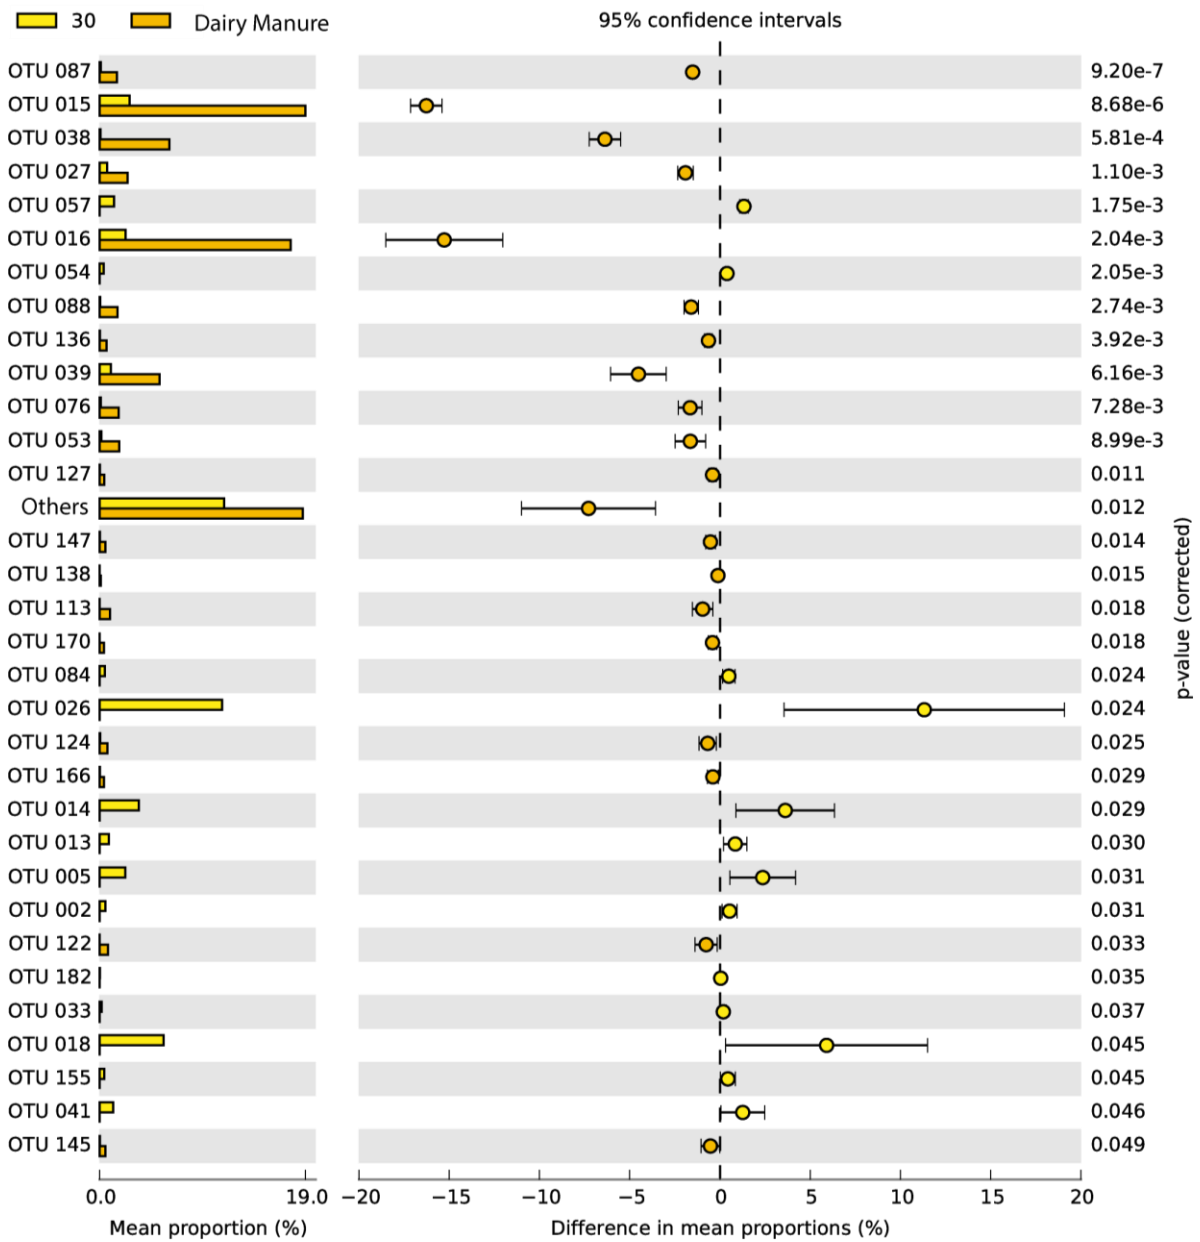

Supplement: 253_2018_9243_MOESM1_ESM.pdf [file 253_2018_9243_MOESM1_ESM.pdf]
